# Supplementary material for: Expression of the myeloid inhibitory receptor CLEC12A correlates with disease activity and cytokines in early rheumatoid arthritis
Source: PubMed Central journal article supplement (PMC8160002; doi:10.1038/s41598-021-90631-7), 2021-05-27
Supplement: 41598_2021_90631_MOESM1_ESM.pdf [file 41598_2021_90631_MOESM1_ESM.pdf]

## SUPPLEMENTARY MATERIAL

### **Expression of the Myeloid Inhibitory Receptor CLEC12A Correlates with Disease Activity and Cytokines in Early Rheumatoid Arthritis**

Myriam Vaillancourt<sup>1,2</sup>, Philippe Desaulniers<sup>3</sup>, Guillaume Paré<sup>1,2</sup>, Nathalie Pagé<sup>1</sup>, Asmaa Lachaab<sup>1,2</sup>, Anthony Kerever<sup>1,2</sup>, Anne-Sophie Julien<sup>4</sup>, Nathalie Amiabile<sup>1</sup>, Martin Pelletier<sup>1,2</sup>, Philippe A. Tessier<sup>1,2</sup>, Louis Bessette<sup>1,3</sup>, Laëtitia Michou<sup>3,5</sup>, Paul R. Fortin<sup>1,3</sup> and Maria J. Fernandes<sup>1,2\*</sup>.

<sup>1</sup> Division of Infectious Diseases and Immunology, CHU de Québec-Université Laval Research Center, Québec City, QC, Canada

<sup>2</sup> Department of Microbiology-Infectious Diseases and Immunology, Faculty of Medicine, Université Laval, Québec City, QC, Canada

<sup>3</sup> Division of Rheumatology, Department of Medicine, CHU de Québec-Université Laval Research Center, Québec City, QC, Canada

<sup>4</sup> Department of mathematics and statistics, Université Laval, Québec City, QC, Canada

<sup>5</sup> Division of Endocrinology et Nephrology, CHU de Québec-Université Laval Research Center, Québec City, QC, Canada

\*Corresponding author: Maria J. Fernandes, Centre de recherche du CHU de Québec-Université Laval, 2705 boulevard Laurier, Room T1-49, Québec, QC, Canada, G1V 4G2, [maria.fernandes@crchudequebec.ulaval.ca](mailto:maria.fernandes@crchudequebec.ulaval.ca)

ORCID (MP): 0000-0001-5033-4947

## SUPPLEMENTARY MATERIAL

### Additional file 1: Antibodies used for staining blood cells for flow cytometry analysis

| Antibody              | Fluorochrome     | Clone         | Company       | Cat. Number | Target cells                      |
|-----------------------|------------------|---------------|---------------|-------------|-----------------------------------|
| CD16                  | PerCP-eFluor 710 | 3G8           | Thermo Fisher | 46-0166     | Neutrophils                       |
| CD36                  | FITC             | eBioNL07      | Thermo Fisher | 11-0369     | Monocytes                         |
| CD193 (CCR3)          | PE               | eBio5E8-G9-B4 | Thermo Fisher | 12-1939     | Eosinophils                       |
| CD56 (NCAM)           | PE/Cyanine5      | CMSSB         | Thermo Fisher | 15-0567     | NK cells                          |
| CD66b                 | PE/Cyanine7      | G10F5         | Thermo Fisher | 25-0666     | Granulocytes                      |
| CD371 (CLEC12A)       | APC              | 50C1          | BioLegend     | 353605      | Myeloid cells                     |
| CD64 (FcγR1)          | APC/eFluor 780   | 10.1          | Thermo Fisher | 47-0649     | Monocytes & activated neutrophils |
| Fixable Viability Dye | eFluor 455UV     | N/A           | Thermo Fisher | 65-0868     | N/A                               |
| CD3                   | eVolve 655       | OKT3          | Thermo Fisher | 86-0037     | T cells                           |
| CD45                  | eFluor450        | 2D1           | Thermo Fisher | 48-9459     | Leukocytes                        |
| CD19                  | eVolve 605       | SJ25C1        | Thermo Fisher | 83-0198     | B cells                           |

## SUPPLEMENTARY MATERIAL

### Additional file 2: Cytokine Analysis of the early RA and healthy donor cohort

| <b>Plasma cytokine</b> | <b>Donor type</b> | <b>n</b> | <b>Mean (pg/mL)</b> | <b>SD</b> |
|------------------------|-------------------|----------|---------------------|-----------|
| IL-18                  | eRA - baseline    | 15       | 14.15               | 13.61     |
|                        | Healthy           | 10       | 15.87               | 11.44     |
| IL-1 RA                | eRA - baseline    | 15       | 754.45              | 905.89    |
|                        | Healthy           | 10       | 136.08              | 150.63    |
| IL-1 $\beta$           | eRA - baseline    | 15       | 1.92                | 2.22      |
|                        | Healthy           | 10       | 0.25                | 0.80      |
| Eotaxin                | eRA - baseline    | 15       | 31.72               | 14.27     |
|                        | Healthy           | 10       | 27.69               | 10.23     |
| IP-10                  | eRA - baseline    | 15       | 59.34               | 142.96    |
|                        | Healthy           | 10       | 11.26               | 5.01      |
| MCP-1                  | eRA - baseline    | 15       | 30.93               | 11.29     |
|                        | Healthy           | 10       | 20.19               | 6.58      |
| MIP-1 $\alpha$         | eRA - baseline    | 15       | 13.80               | 18.49     |
|                        | Healthy           | 10       | 16.10               | 17.03     |
| MIP-1 $\beta$          | eRA - baseline    | 15       | 135.54              | 156.00    |
|                        | Healthy           | 10       | 63.99               | 119.32    |
| RANTES                 | eRA - baseline    | 15       | 81.49               | 54.55     |
|                        | Healthy           | 10       | 37.91               | 49.66     |
| SDF-1 $\alpha$         | eRA - baseline    | 15       | 2152.18             | 4082.27   |
|                        | Healthy           | 10       | 451.00              | 192.31    |

*eRA* early arthritis; *n* sample number

## SUPPLEMENTARY MATERIAL

### Additional file 3: Comparison of neutrophil and monocyte CLEC12A expression of healthy donors and eRA patients at 18 months

|                 | Neutrophil CLEC12A |        | Monocyte CLEC12A |        |
|-----------------|--------------------|--------|------------------|--------|
|                 | Expression         | SD     | Expression       | SD     |
| Healthy donors  | 2774.31            | 475.80 | 4769.69          | 667.84 |
| eRA (18 months) | 2209.18            | 318.83 | 5103.18          | 432.56 |

*P* value HD vs eRA = 1.00

(NS)

## SUPPLEMENTARY MATERIAL

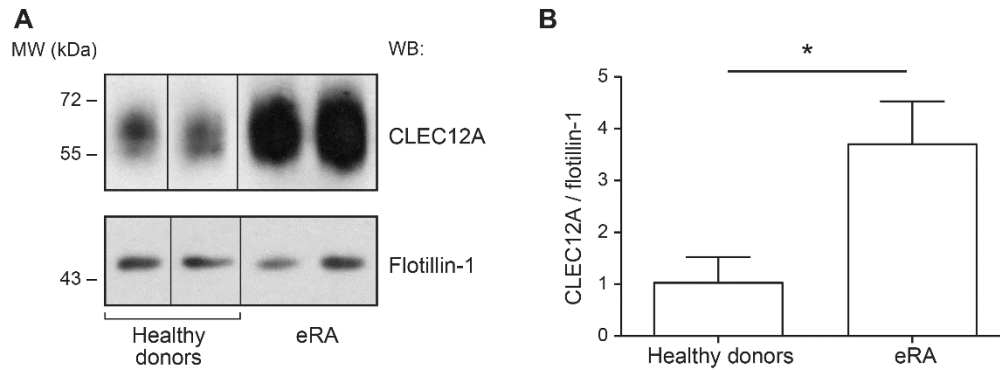

**Additional file 4: CLEC12A expression in eRA patients at baseline and healthy donor neutrophils.** Peripheral blood neutrophils were purified and lysed before immunoblotting with the 50C1 anti-CLEC12A antibody. **(A)** A representative blot of neutrophils of two different healthy donors (*first two lanes*) and two eRA patients with the highest level of CLEC12A expression at baseline as determined by flow cytometry (*last two lanes*) is shown. Flotillin-1 expression was used as a loading control. All CLEC12A samples were migrated on the same gel, under non-reducing conditions (see the original blot on the next page). The lines delineate the lanes of the gel that were cropped to group the healthy donor samples next to the patient samples. **(B)** Densitometry analysis of neutrophil CLEC12A expression of the 4 patients with the highest level of expression of CLEC12A (lanes 5, 6, 7, 9) as determined by flow cytometry compared to 4 healthy donors (lanes 1-4). Statistical analysis: Student's t-test ( $p = 0.025$ )

## SUPPLEMENTARY MATERIAL

Original blot of figure in Additional file 4:

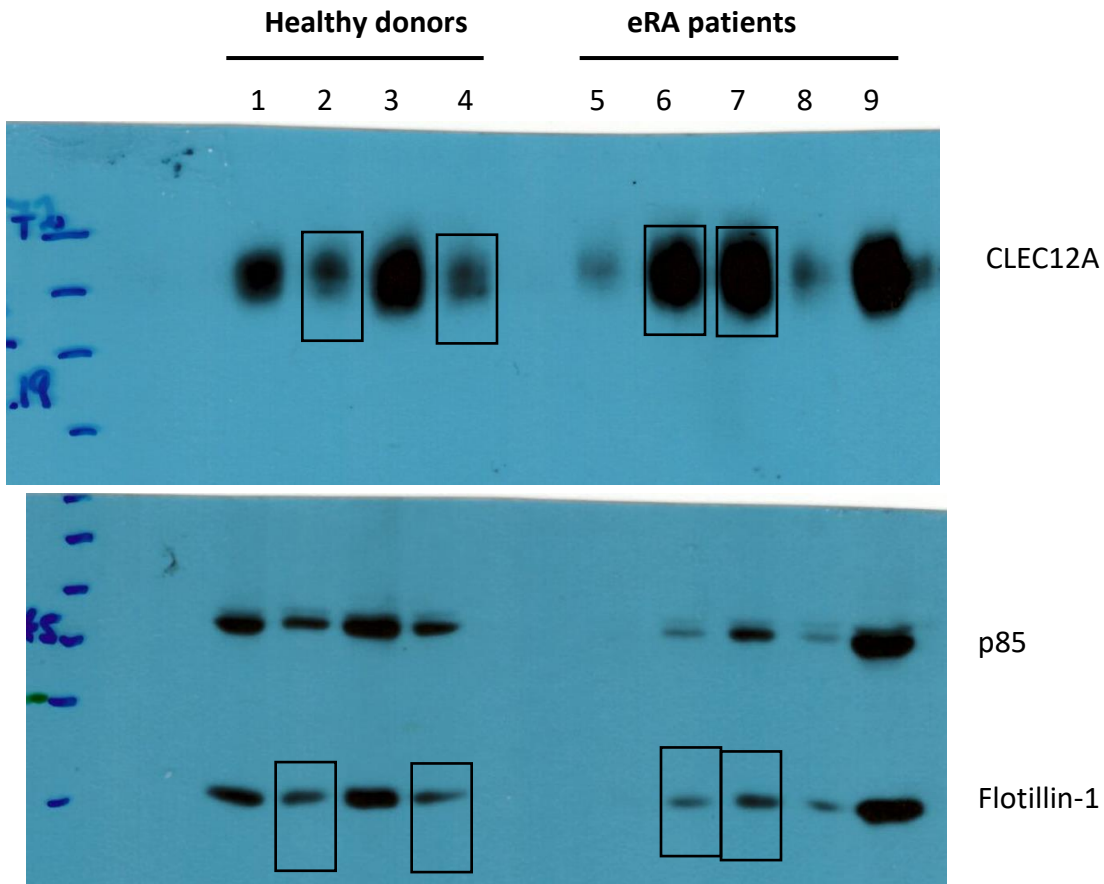

**Note:** The sample in lane 8 corresponds to the neutrophil lysate of an eRA patient whose level of CLEC12A expression is below the mean of CLEC12A expression of healthy donors. The intensity of the CLEC12A band in lane 5 is low since we had very few neutrophils for this patient in our lysate and thus much less material in the well to load as seen by the loading controls flotillin-1 and p85. This patient expresses higher levels of CLEC12A than healthy donors by flow cytometry.

Regarding the blotting of the membranes, all samples were migrated on the same gel, under non-reducing conditions and transferred to a PDVF membrane. Blotting was performed on the full length membrane with each antibody. The membrane was not cut prior to hybridization. The lines delineate the lanes of the gel that were cropped to group the healthy donor samples next to the patient samples in the figure in Additional file 4.

SUPPLEMENTARY MATERIAL

We show here the other film we have for this experiment in our files. It was exposed for a shorter time.

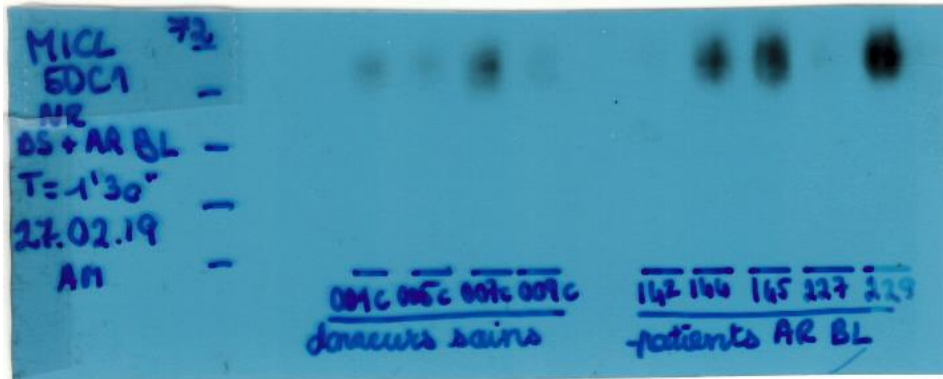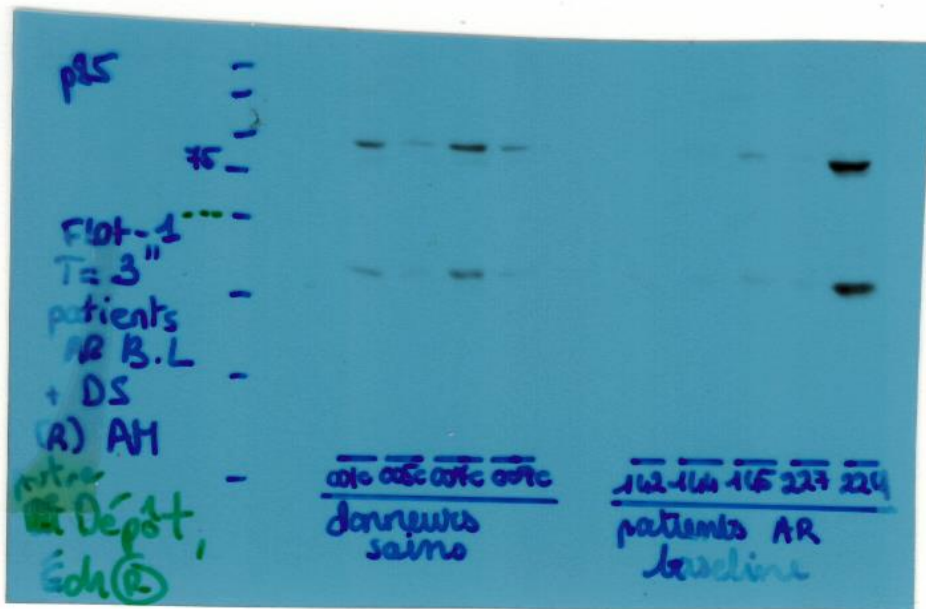

## SUPPLEMENTARY MATERIAL

### Additional file 5: Flow cytometry gating strategy

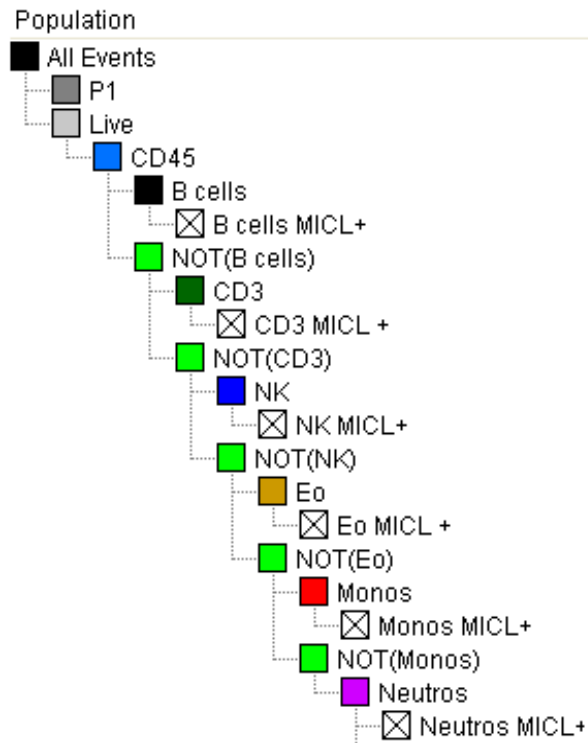

#### Legend:

Leukocytes = CD45<sup>+</sup>

B cells = CD19<sup>+</sup>

T cells = CD3<sup>+</sup>

NK cells = CD56<sup>+</sup> (NCAM)

Eosinophils (Eo) = CD193<sup>+</sup> (CCR3)

Monocytes (Monos) = CD36<sup>+</sup>

Neutrophils (Neutros) = CD16b<sup>+</sup>



## SUPPLEMENTARY MATERIAL

### Additional file 6: Purity of healthy donor neutrophils isolated with the Stem Cell EasySep direct neutrophil isolation kit

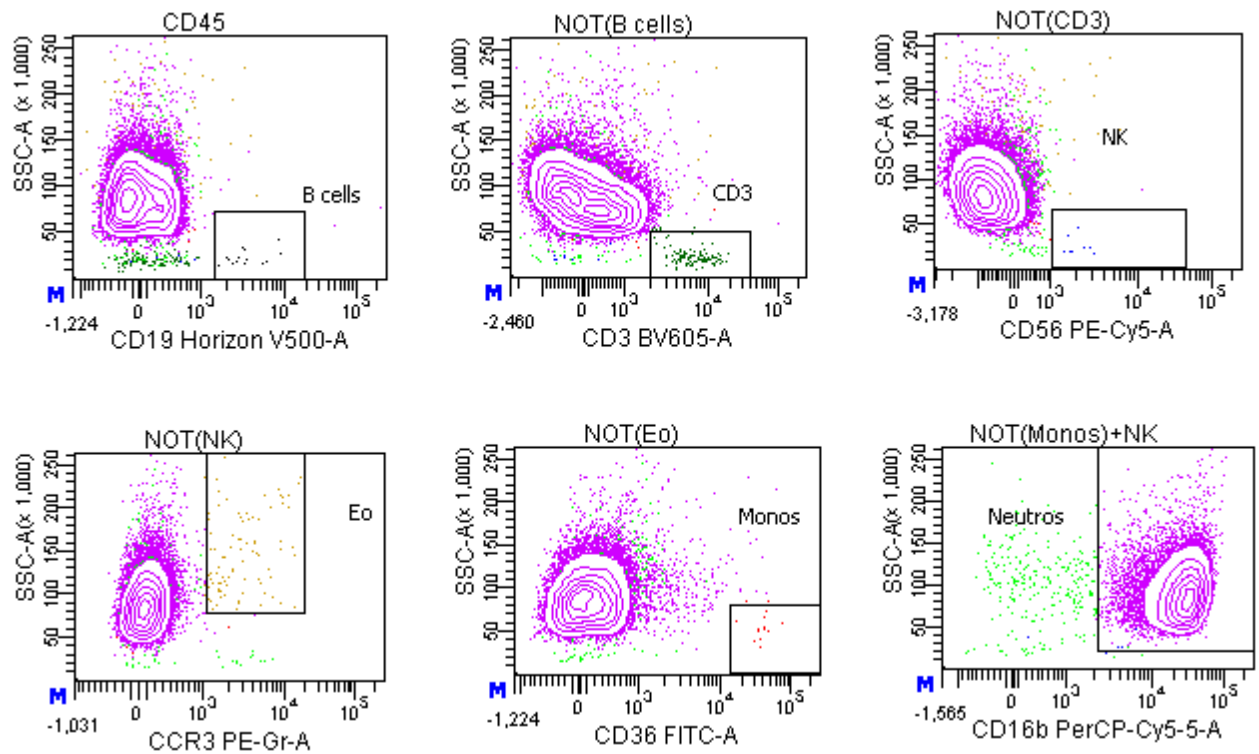

| Population    | #Events | %Parent | %Total |
|---------------|---------|---------|--------|
| All Events    | 15,203  | ###     | 100.0  |
| P1            | 55      | 0.4     | 0.4    |
| Live          | 15,130  | 99.5    | 99.5   |
| CD45          | 15,130  | 100.0   | 99.5   |
| B cells       | 14      | 0.1     | 0.1    |
| B cells M1CL+ | 0       | 0.0     | 0.0    |
| NOT(B cells)  | 15,116  | 99.9    | 99.4   |
| CD3           | 117     | 0.8     | 0.8    |
| CD3 M1CL+     | 3       | 2.6     | 0.0    |
| NOT(CD3)      | 14,999  | 99.2    | 98.7   |
| NK            | 10      | 0.1     | 0.1    |
| NK M1CL+      | 2       | 20.0    | 0.0    |
| NOT(NK)       | 14,989  | 99.9    | 98.6   |
| Eo            | 105     | 0.7     | 0.7    |
| Eo M1CL+      | 78      | 74.3    | 0.5    |
| NOT(Eo)       | 14,884  | 99.3    | 97.9   |
| Monos         | 14      | 0.1     | 0.1    |
| Monos M1CL+   | 13      | 92.9    | 0.1    |
| NOT(Monos)    | 14,870  | 99.9    | 97.8   |
| Neutros       | 14,613  | 98.3    | 96.1   |

## SUPPLEMENTARY MATERIAL

### Additional file 7: Purity of eRA neutrophils isolated with the Stem Cell EasySep direct neutrophil isolation kit

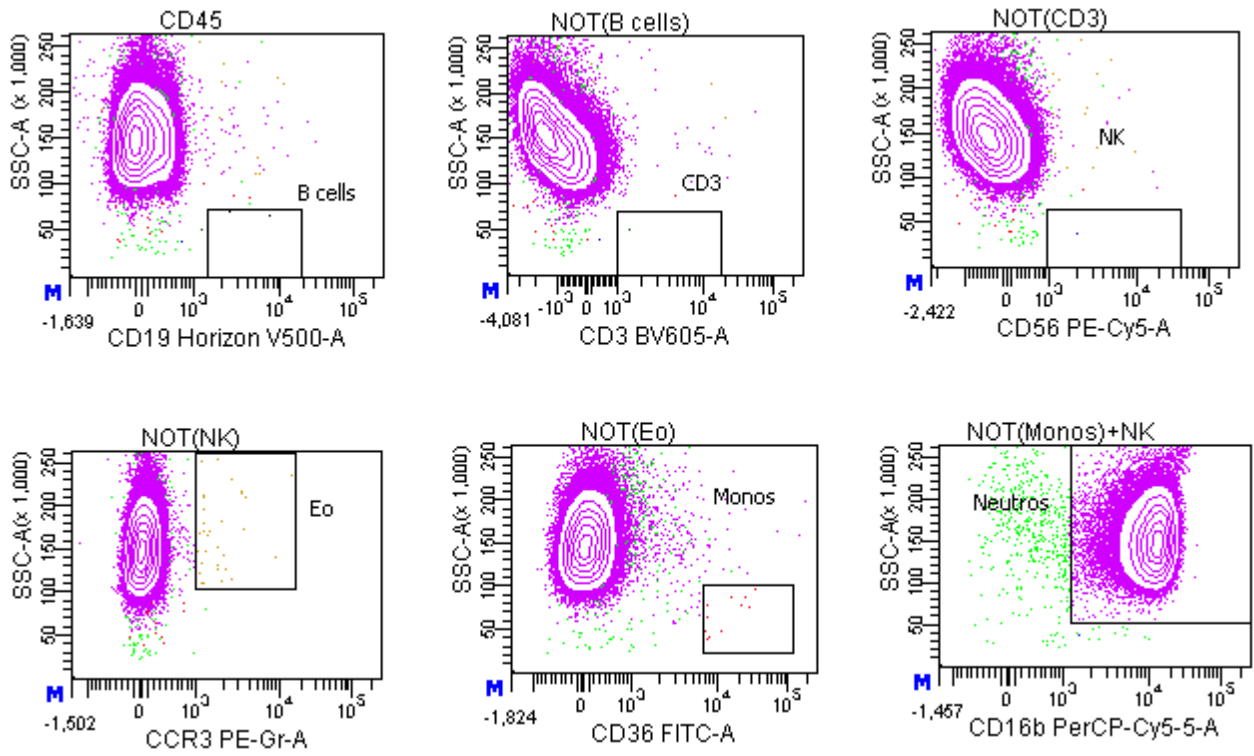

| Population      | #Events | %Parent | %Total |
|-----------------|---------|---------|--------|
| All Events      | 50,189  | ###     | 100.0  |
| P1              | 100     | 0.2     | 0.2    |
| Live            | 50,056  | 99.7    | 99.7   |
| CD45            | 50,035  | 100.0   | 99.7   |
| B cells         | 2       | 0.0     | 0.0    |
| ⊗ B cells MICL+ | 1       | 50.0    | 0.0    |
| NOT(B cells)    | 50,033  | 100.0   | 99.7   |
| CD3             | 2       | 0.0     | 0.0    |
| ⊗ CD3 MICL+     | 2       | 100.0   | 0.0    |
| NOT(CD3)        | 50,031  | 100.0   | 99.7   |
| NK              | 1       | 0.0     | 0.0    |
| ⊗ NK MICL+      | 1       | 100.0   | 0.0    |
| NOT(NK)         | 50,030  | 100.0   | 99.7   |
| Eo              | 32      | 0.1     | 0.1    |
| ⊗ Eo MICL+      | 32      | 100.0   | 0.1    |
| NOT(Eo)         | 49,998  | 99.9    | 99.6   |
| Monos           | 14      | 0.0     | 0.0    |
| ⊗ Monos MICL+   | 12      | 85.7    | 0.0    |
| NOT(Monos)      | 49,984  | 100.0   | 99.6   |
| Neutros         | 49,536  | 99.1    | 98.7   |
